# Supplementary material for: Evaluation of SCD, ACACA and FASN Mutations: Effects on Pork Quality and Other Production Traits in Pigs Selected Based on RNA-Seq Results
Source: PubMed Central journal article supplement (PMC7023423; doi:10.3390/ani10010123), 2020-01-12
Supplement: animals-10-00123-s001.pdf [file animals-10-00123-s001.pdf]

**Table S1.** Pig trait values dependent on breed effect (mean±S.D).

| Index                                  | PLW (96)                  | PUL (150)                 | PL (96)                   | Total (336) |
|----------------------------------------|---------------------------|---------------------------|---------------------------|-------------|
| Water exudation (%)                    | 35.6 ± 7.6 <sup>A</sup>   | 28.8 ± 2.50 <sup>B</sup>  | 36.2 ± 6.54 <sup>A</sup>  | 33.4 ± 0.44 |
| Meat color L*(lightness)               | 53.8 ± 2.43 <sup>A</sup>  | 55.1 ± 3.73 <sup>B</sup>  | 55.1 ± 2.31 <sup>B</sup>  | 54.8 ± 3.10 |
| Meat color b*(yellowness)              | 2.37 ± 0.91 <sup>A</sup>  | 2.94 ± 1.17 <sup>B</sup>  | 2.45 ± 0.68 <sup>A</sup>  | 2.65 ± 1.02 |
| pH 45 min ( <i>longissimus dorsi</i> ) | 6.30 ± 0.19 <sup>A</sup>  | 6.16 ± 0.21 <sup>B</sup>  | 6.28 ± 0.16 <sup>A</sup>  | 6.23 ± 0.20 |
| pH 24 h ( <i>longissimus dorsi</i> )   | 5.59 ± 0.11 <sup>A</sup>  | 5.52 ± 0.09 <sup>B</sup>  | 5.61 ± 0.10 <sup>A</sup>  | 5.57 ± 0.11 |
| pH 45 min ( <i>semimembranosus</i> )   | 6.33 ± 0.16 <sup>A</sup>  | 6.21 ± 0.07 <sup>B</sup>  | 6.28 ± 0.14 <sup>A</sup>  | 6.22 ± 0.19 |
| pH 24 h ( <i>semimembranosus</i> )     | 5.62 ± 0.12 <sup>A</sup>  | 5.56 ± 0.11 <sup>B</sup>  | 5.65 ± 0.10 <sup>A</sup>  | 5.60 ± 0.11 |
| IMF (%)                                | 1.34 ± 0.41 <sup>A</sup>  | 1.70 ± 0.46 <sup>B</sup>  | 1.12 ± 0.14 <sup>C</sup>  | 1.41 ± 0.43 |
| Carcass yield (%)                      | 77.2 ± 2.71 <sup>A</sup>  | 74.5 ± 2.28 <sup>B</sup>  | 76.2 ± 2.27 <sup>C</sup>  | 75.7 ± 2.47 |
| Lion mass (kg)                         | 6.18 ± 0.58 <sup>A</sup>  | 5.06 ± 0.43 <sup>B</sup>  | 5.95 ± 0.60 <sup>C</sup>  | 5.62 ± 0.73 |
| Ham mass (kg)                          | 9.28 ± 0.62 <sup>A</sup>  | 8.78 ± 0.62 <sup>B</sup>  | 9.23 ± 0.40 <sup>A</sup>  | 9.05 ± 0.61 |
| Average backfat thickness (cm)         | 1.31 ± 0.31 <sup>Aa</sup> | 1.55 ± 0.42 <sup>B</sup>  | 1.23 ± 0.28 <sup>Ab</sup> | 1.40 ± 0.38 |
| Loin eye area (cm <sup>2</sup> )       | 52.2 ± 5.37               | 51.9 ± 5.53               | 53.4 ± 4.50               | 52.4 ± 5.22 |
| Lean meat percentage (%)               | 61.0 ± 3.01 <sup>Aa</sup> | 60.1 ± 3.08 <sup>Ab</sup> | 62.4 ± 2.21 <sup>B</sup>  | 61.1 ± 2.95 |
| Primary cuts (kg)                      | 24.1 ± 1.27 <sup>A</sup>  | 22.2 ± 1.45 <sup>B</sup>  | 24.0 ± 1.09 <sup>A</sup>  | 23.2 ± 1.57 |
| Average daily gain (g/day)             | 924 ± 107 <sup>A</sup>    | 778 ± 141 <sup>B</sup>    | 945 ± 105 <sup>A</sup>    | 865 ± 146   |
| Feed conversion (kg/kg)                | 2.69 ± 0.22 <sup>A</sup>  | 3.04 ± 0.33 <sup>B</sup>  | 2.75 ± 0.20 <sup>A</sup>  | 2.86 ± 0.32 |
| Daily feed intake (kg)                 | 2.48 ± 0.30 <sup>A</sup>  | 2.33 ± 0.31 <sup>B</sup>  | 2.59 ± 0.25 <sup>C</sup>  | 2.44 ± 0.31 |
| Age at slaughter (day)                 | 167 ± 16.4 <sup>A</sup>   | 184 ± 21.2 <sup>B</sup>   | 165 ± 19.9 <sup>A</sup>   | 174 ± 22.6  |

Mean± standard deviation. Within rows, in each column, means denoted by different letter superscripts differ <sup>A</sup>B<sup>P</sup><0.01; <sup>ab</sup>P<0.05. PLW – Polish Large White, PUL – Puławska, PL – Polish Landrace.

**Table S2.** The frequencies of genotypes and alleles in *FASN* gene.

|     | Genotype   |           |           | Alleles |      |
|-----|------------|-----------|-----------|---------|------|
|     | GG         | AG        | AA        | G       | A    |
| PL  | -          | 0,42 (39) | 0,58 (54) | 0,21    | 0,79 |
| PLW | 0,11 (10)  | 0,73 (65) | 0,16 (14) | 0,48    | 0,52 |
| PUL | 0,66 (100) | 0,3 (46)  | 0,04 (6)  | 0,81    | 0,19 |

**Table S3.** The frequencies of genotypes and alleles in *SCD* gene.

|     | Genotype  |           |          | Alleles |      |
|-----|-----------|-----------|----------|---------|------|
|     | GG        | AG        | AA       | G       | A    |
| PL  | 0,91 (74) | 0,09 (7)  | -        | 0,96    | 0,04 |
| PLW | 0,82 (55) | 0,18 (12) | -        | 0,91    | 0,09 |
| PUL | 0,66 (99) | 0,32 (49) | 0,02 (3) | 0,82    | 0,18 |

**Table S4.** The frequencies of genotypes and alleles in *ACACA* gene.

|     | Genotype  |           |           | Alleles |      |
|-----|-----------|-----------|-----------|---------|------|
|     | TT        | CT        | CC        | T       | C    |
| PL  | 0,62 (49) | 0,35 (28) | 0,03 (2)  | 0,80    | 0,20 |
| PLW | 0,74 (64) | 0,24 (21) | 0,01 (1)  | 0,87    | 0,13 |
| PUL | 0,57 (87) | 0,36 (55) | 0,07 (10) | 0,75    | 0,25 |

**Table S5.** Association of *FASN* mutation and analyzed traits (LSM±S.E.).

| Index                                | Genotype | PLW         | PUŁ          | PL                     | Total                     | GLM         |       |
|--------------------------------------|----------|-------------|--------------|------------------------|---------------------------|-------------|-------|
|                                      |          |             |              |                        |                           | <i>FASN</i> | Breed |
| IMF (%)                              | GG       | 1.36±0.11   | 1.66±0.05    | -                      | 1.56±0.06                 | ns          | ***   |
|                                      | AG       | 1.31±0.05   | 1.75±0.08    | 1.11±0.02              | 1.58±0.05                 |             |       |
|                                      | AA       | 1.44±0.11   | 1.52±0.19    | 1.15±0.02              | 1.56±0.07                 |             |       |
| Meat color a* (redness)              | GG       | 16.0±0.49   | 15.8±0.11    | -                      | 16.8±0.20                 | ns          | ns    |
|                                      | AG       | 16.8±0.27   | 15.7±0.14    | 16.3±0.14              | 16.7±0.16                 |             |       |
|                                      | AA       | 17.0±0.42   | 15.9±0.32    | 16.5±0.16              | 16.6±0.18                 |             |       |
| pH 24 h ( <i>longissimus dorsi</i> ) | GG       | 5.61±0.03   | 5.52±0.01    | -                      | 5.49±0.02                 | ns          | ***   |
|                                      | AG       | 5.59±0.01   | 5.53±0.01    | 5.61±0.01              | 5.49±0.01                 |             |       |
|                                      | AA       | 5.59±0.03   | 5.52±0.04    | 5.61±0.02              | 5.49±0.02                 |             |       |
| pH 24 h ( <i>semiembranosus</i> )    | GG       | 5.62±0.04   | 5.57±0.04    | -                      | 5.60±0.02                 | ns          | ***   |
|                                      | AG       | 5.63±0.02   | 5.56±0.02    | 5.65±0.01 <sup>a</sup> | 5.59±0.02                 |             |       |
|                                      | AA       | 5.61±0.04   | 5.53±0.01    | 5.65±0.02 <sup>b</sup> | 5.58±0.02                 |             |       |
| Ham mass (kg)                        | GG       | 9.30±0.18   | 8.80±0.16    | -                      | 8.84±0.08 <sup>A</sup>    | ns          | ***   |
|                                      | AG       | 9.21±0.08   | 8.72±0.07    | 9.18±0.06              | 9.05±0.07 <sup>B</sup>    |             |       |
|                                      | AA       | 9.27±0.15   | 8.96±0.06    | 9.29±0.05              | 9.26±0.08 <sup>C</sup>    |             |       |
| Loin eye area (cm <sup>2</sup> )     | GG       | 52.4 ± 1.60 | 51.9 ± 1.63  | -                      | 51.9 ± 0.80               | ns          | ***   |
|                                      | AG       | 52.6 ± 0.70 | 51.9 ± 0.71  | 53.2 ± 0.6             | 52.5 ± 0.63               |             |       |
|                                      | AA       | 49.3 ± 1.36 | 54.6 ± 0.56  | 53.2 ± 0.5             | 52.3 ± 0.80               |             |       |
| Lean meat percentage (%)             | GG       | 61.8 ± 0.86 | 60.3 ± 0.98  | -                      | 60.4 ± 0.47 <sup>A</sup>  | ns          | ***   |
|                                      | AG       | 60.9 ± 0.37 | 60.0 ± 0.43  | 62.4 ± 0.34            | 61.0 ± 0.37 <sup>AB</sup> |             |       |
|                                      | AA       | 61.0 ± 0.73 | 61.0 ± 0.34  | 62.1 ± 0.30            | 61.8 ± 0.47 <sup>B</sup>  |             |       |
| Primary cuts (kg)                    | GG       | 24.4 ± 0.34 | 22.3 ± 0.35  | -                      | 22.5 ± 0.17 <sup>A</sup>  | ns          | ***   |
|                                      | AG       | 24.0 ± 0.15 | 22.1 ± 0.15  | 23.8 ± 0.13            | 23.3 ± 0.14 <sup>B</sup>  |             |       |
|                                      | AA       | 23.7 ± 0.29 | 22.9 ± 0.112 | 24.0 ± 0.12            | 23.9 ± 0.17 <sup>C</sup>  |             |       |

Allele: A– wild type; G– mutation; Within rows, in each column, means denoted by different letter superscripts differ <sup>AB</sup>P<0.01; <sup>ab</sup>P<0.05. PLW – Polish Large White, PUŁ – Puławska, PL – Polish The linear model for mixed analysis was:  $Y_{ijkl} = \mu + d_i + b_j + (d_i \cdot b_j) + \alpha(x_{ijk}) + e_{ijkl}$  where:  $Y_{ijk}$  – observation,  $\mu$  – overall mean,  $d_i$  –fixed effect of genotype group,  $b_j$  – fixed effect of the breed,  $(d_i \cdot b_j)$  – the interaction between  $d_i$  genotype group and breed,  $\alpha(x_{ijk})$  – covariate for weight of the right side of the carcass,  $e_{ijkl}$  – random error. GLM model for analysis within breeds omitted  $b_j$  – fixed effect of breed and  $(d_i \cdot b_j)$  – the interaction between  $d_i$  genotype group and breed. Landrace.

**Table S6.** Association of the ACACA mutation and analyzed traits (LSM±S.E).

| Index                                | Genotype | PLW         | PUŁ          | PL                       | Total                     | GLM   |       |
|--------------------------------------|----------|-------------|--------------|--------------------------|---------------------------|-------|-------|
|                                      |          |             |              |                          |                           | ACACA | Breed |
| Water exudation (%)                  | CC       | -           | 30.7 ± 1.97  | -                        | 30.9 ± 2.02               |       |       |
|                                      | CT       | 37.3 ± 1.76 | 30.6 ± 0.85  | 36.2 ± 1.29              | 33.5 ± 0.99               | ns    | **    |
|                                      | TT       | 34.9 ± 1.04 | 29.9 ± 0.68  | 36.8 ± 0.96              | 33.2 ± 0.84               |       |       |
| Meat color L* (lightness)            | CC       | -           | 54.6 ± 1.18  | -                        | 54.7 ± 0.87               |       |       |
|                                      | CT       | 53.7 ± 0.52 | 55.3 ± 0.51  | 55.5 ± 0.44              | 55.1 ± 0.69               | ns    | ***   |
|                                      | TT       | 54.1 ± 0.31 | 55.1 ± 0.41  | 55.0 ± 0.33              | 54.7 ± 0.66               |       |       |
| Meat colour a* (redness)             | CC       | -           | 15.7 ± 0.32  | -                        | 15.9 ± 0.35               |       |       |
|                                      | CT       | 16.7 ± 0.35 | 15.7 ± 0.14  | 16.3 ± 0.19              | 16.1 ± 0.17               | ns    | ns    |
|                                      | TT       | 16.7 ± 0.21 | 15.8 ± 0.11  | 16.5 ± 0.14              | 16.3 ± 0.15               |       |       |
| pH 24 h ( <i>longissimus dorsi</i> ) | CC       | -           | 5.54 ± 0.03  | -                        | 5.56 ± 0.03               | ns    | ***   |
|                                      | CT       | 5.62 ± 0.02 | 5.52 ± 0.01  | 5.63 ± 0.02              | 5.57 ± 0.02               |       |       |
|                                      | TT       | 5.65 ± 0.01 | 5.53 ± 0.01  | 5.60 ± 0.02              | 5.56 ± 0.02               |       |       |
| pH 24 h ( <i>semimembranosus</i> )   | CC       | -           | 5.58 ± 0.03  | -                        | 5.59 ± 0.03               | ns    | ***   |
|                                      | CT       | 5.64 ± 0.03 | 5.55 ± 0.01  | 5.68 ± 0.02 <sup>a</sup> | 5.60 ± 0.02               |       |       |
|                                      | TT       | 5.62 ± 0.02 | 5.57 ± 0.01  | 5.63 ± 0.02 <sup>b</sup> | 5.60 ± 0.02               |       |       |
| Loin mass (kg)                       | CC       | -           | 5.06 ± 0.11  | -                        | 5.41 ± 0.13 <sup>a</sup>  |       |       |
|                                      | CT       | 6.10 ± 0.11 | 5.08 ± 0.05  | 6.03 ± 0.09              | 5.54 ± 0.06 <sup>ab</sup> | ns    | ***   |
|                                      | TT       | 6.25 ± 0.06 | 5.06 ± 0.04  | 5.90 ± 0.07              | 5.65 ± 0.05 <sup>b</sup>  |       |       |
| Ham mass (kg)                        | CC       | -           | 8.80 ± 0.16  | -                        | 8.92 ± 0.15               |       |       |
|                                      | CT       | 9.37 ± 0.13 | 8.73 ± 0.07  | 9.28 ± 0.09              | 9.00 ± 0.07               | ns    | ***   |
|                                      | TT       | 9.22 ± 0.08 | 8.80 ± 0.06  | 9.26 ± 0.07              | 9.05 ± 0.06               |       |       |
| Loin eye area (cm <sup>2</sup> )     | CC       | -           | 52.9 ± 1.63  | -                        | 53.7 ± 1.45               |       |       |
|                                      | CT       | 51.4 ± 1.20 | 52.4 ± 0.71  | 53.6 ± 0.7               | 52.5 ± 0.71               | ns    | ***   |
|                                      | TT       | 52.4 ± 0.71 | 51.6 ± 0.56  | 53.3 ± 0.3               | 52.3 ± 0.61               |       |       |
| Lean meat percentage (%)             | CC       | -           | 61.0 ± 0.98  | -                        | 61.5 ± 0.84               |       |       |
|                                      | CT       | 61.7 ± 0.63 | 59.8 ± 0.43  | 62.4 ± 0.39              | 60.9 ± 0.41               | ns    | ***   |
|                                      | TT       | 60.8 ± 0.37 | 60.4 ± 0.34  | 62.3 ± 0.29              | 61.0 ± 0.35               |       |       |
| Primary cuts (kg)                    | CC       | -           | 22.4 ± 0.35  | -                        | 22.9 ± 0.31               |       |       |
|                                      | CT       | 24.1 ± 0.25 | 22.1 ± 0.15  | 24.0 ± 0.14              | 23.0 ± 0.15               | ns    | ***   |
|                                      | TT       | 24.1 ± 0.15 | 22.3 ± 0.112 | 23.9 ± 0.11              | 23.3 ± 0.13               |       |       |
| Feed conversion (kg/kg)              | CC       | -           | 3.03 ± 0.10  | -                        | 2.98 ± 0.08               |       |       |
|                                      | CT       | 2.68 ± 0.05 | 3.02 ± 0.05  | 2.71 ± 0.04              | 2.87 ± 0.04               | ns    | ***   |
|                                      | TT       | 2.67 ± 0.03 | 3.06 ± 0.04  | 2.75 ± 0.03              | 2.86 ± 0.03               |       |       |
| Age at slaughter (day)               | CC       | -           | 188 ± 7      | -                        | 182 ± 6 <sup>a</sup>      |       |       |
|                                      | CT       | 165 ± 4     | 185 ± 3      | 166 ± 4                  | 176 ± 3 <sup>ab</sup>     | ns    | ***   |
|                                      | TT       | 168 ± 2     | 183 ± 2      | 162 ± 3                  | 173 ± 3 <sup>b</sup>      |       |       |

Allele: C – wild type, T – mutation. Within rows, in each column, means denoted by different letter superscripts differ <sup>AB</sup>P<0.01; <sup>ab</sup>P<0.05. PLW – Polish Large White, PUŁ – Puławska, PL – Polish Landrace. The linear model for mixed analysis was:  $Y_{ijkl} = \mu + d_i + b_j + (d_i \cdot b_j) + \alpha(x_{ijk}) + e_{ijkl}$  where:  $Y_{ijk}$  – observation,  $\mu$  – overall mean,  $d_i$  – fixed effect of genotype group,  $b_j$  – fixed effect of the breed,  $(d_i \cdot b_j)$  – the interaction between  $d_i$  genotype group and breed,  $\alpha(x_{ijk})$  – covariate for

---

weight of the right side of the carcass,  $e_{ijkl}$  – random error. GLM model for analysis within breeds omitted  $b_j$  – fixed effect of breed and  $(d_i \cdot b_j)$  – the interaction between  $d_i$  genotype group and breed.

---

**Table S7.** Association of SCD mutation and analyzed traits (LSM±S.E).

| Index                             | Genotype | PLW                    | PUŁ         | PL                     | Total                    | GLM |       |
|-----------------------------------|----------|------------------------|-------------|------------------------|--------------------------|-----|-------|
|                                   |          |                        |             |                        |                          | SCD | Breed |
| Meat colour a*<br>(redness)       | AA       | -                      | -           | -                      | -                        | ns  | *     |
|                                   | AG       | 16.4 ± 0.43            | 15.9 ± 0.15 | 16.2 ± 0.39            | 16.0 ± 0.21              |     |       |
|                                   | GG       | 16.7 ± 0.23            | 15.7 ± 0.11 | 16.4 ± 0.12            | 16.2 ± 0.16              |     |       |
| pH 24 h (longissimus<br>dorsi)    | AA       | -                      | -           | -                      | -                        | ns  | ***   |
|                                   | AG       | 5.62 ± 0.03            | 5.52 ± 0.01 | 5.68 ± 0.04            | 5.55 ± 0.02              |     |       |
|                                   | GG       | 5.59 ± 0.02            | 5.52 ± 0.01 | 5.61 ± 0.01            | 5.57 ± 0.02              |     |       |
| pH 45 min<br>(semimembranosus)    | AA       | -                      | -           | -                      | -                        | ns  | ***   |
|                                   | AG       | 6.32 ± 0.05            | 6.13 ± 0.03 | 6.27 ± 0.05            | 6.18 ± 0.03              |     |       |
|                                   | GG       | 6.32 ± 0.03            | 6.12 ± 0.02 | 6.29 ± 0.02            | 6.22 ± 0.03              |     |       |
| pH 24 h<br>(semimembranosus)      | AA       | -                      | -           | -                      | -                        | ns  | ***   |
|                                   | AG       | 5.67 ± 0.04            | 5.56 ± 0.02 | 5.68 ± 0.04            | 5.59 ± 0.02              |     |       |
|                                   | GG       | 5.63 ± 0.02            | 5.56 ± 0.01 | 5.65 ± 0.01            | 5.61 ± 0.02              |     |       |
| Carcass yield (%)                 | AA       | -                      | -           | -                      | -                        | ns  | **    |
|                                   | AG       | 77.7±0.33 <sup>a</sup> | 74.2±0.09   | 77.1±0.24 <sup>A</sup> | 75.2±0.15                |     |       |
|                                   | GG       | 77.1±0.18 <sup>b</sup> | 74.6±0.06   | 76.3±0.07 <sup>B</sup> | 75.8±0.12                |     |       |
| Average backfat<br>thickness (cm) | AA       | -                      | -           | -                      | -                        | ns  | ***   |
|                                   | AG       | 1.39 ± 0.08            | 1.55 ± 0.06 | 1.35 ± 0.10            | 1.50 ± 0.06              |     |       |
|                                   | GG       | 1.30 ± 0.04            | 1.56 ± 0.04 | 1.23 ± 0.03            | 1.39 ± 0.05              |     |       |
| Loin eye area (cm <sup>2</sup> )  | AA       | -                      | -           | -                      | -                        | ns  | ***   |
|                                   | AG       | 52.4 ± 1.42            | 51.1 ± 0.74 | 52.9 ± 1.54            | 51.6 ± 0.86              |     |       |
|                                   | GG       | 52.0 ± 0.76            | 52.2 ± 0.52 | 53.4 ± 0.47            | 52.5 ± 0.68              |     |       |
| Lean meat percentage<br>(%)       | AA       | -                      | -           | -                      | -                        | ns  | ***   |
|                                   | AG       | 59.9 ± 0.79            | 59.9 ± 0.46 | 61.4 ± 0.77            | 60.0 ± 0.50 <sup>a</sup> |     |       |
|                                   | GG       | 61.5 ± 0.42            | 60.4 ± 0.32 | 62.4 ± 0.24            | 61.3 ± 0.37 <sup>b</sup> |     |       |
| Primary cuts (kg)                 | AA       | -                      | -           | -                      | -                        | ns  | ***   |
|                                   | AG       | 23.9 ± 0.31            | 22.0 ± 0.16 | 23.8 ± 0.30            | 22.5 ± 0.18 <sup>a</sup> |     |       |
|                                   | GG       | 24.2 ± 0.17            | 22.3 ± 0.11 | 24.0 ± 0.09            | 23.3 ± 0.15 <sup>b</sup> |     |       |
| Average daily gain<br>(g/day)     | GG       | -                      | -           | -                      | -                        | ns  | ***   |
|                                   | AG       | 967±32                 | 778 ± 21    | 906 ± 41               | 826 ± 23                 |     |       |
|                                   | AA       | 926±17                 | 779 ± 15    | 948 ± 13               | 870 ± 18                 |     |       |
| Feed conversion<br>(kg/kg b. w.)  | GG       | -                      | -           | -                      | -                        | ns  | ***   |
|                                   | AG       | 2.62 ± 0.07            | 2.99 ± 0.05 | 2.79 ± 0.08            | 2.90 ± 0.05              |     |       |
|                                   | AA       | 2.68 ± 0.04            | 3.08 ± 0.03 | 2.76 ± 0.02            | 2.93 ± 0.03              |     |       |
| Daily feed intake (kg)            | GG       | -                      | -           | -                      | -                        | ns  | ***   |
|                                   | AG       | 2.54 ± 0.10            | 2.31 ± 0.05 | 2.52 ± 0.10            | 2.37 ± 0.05              |     |       |
|                                   | AA       | 2.48 ± 0.05            | 2.37 ± 0.03 | 2.60 ± 0.03            | 2.47 ± 0.04              |     |       |
| Age at slaughter (day)            | GG       | -                      | -           | -                      | -                        | ns  | ***   |
|                                   | AG       | 163 ± 5                | 184 ± 3     | 159 ± 3                | 177 ± 4                  |     |       |
|                                   | AA       | 166 ± 3                | 184 ± 9     | 166 ± 2                | 174 ± 3                  |     |       |

Allele: A– wild type, G – mutation. Within rows, in each column, means denoted by different letter superscripts differ <sup>ab</sup>P<0.01; <sup>ab</sup>P<0.05. PLW – Polish Large White, PUŁ – Puławska, PL – Polish Landrace. The linear model for mixed analysis was:  $Y_{ijkl} = \mu + d_i + b_j + (d_i \cdot b_j) + \alpha(x_{ijk}) + e_{ijkl}$  where:  $Y_{ijk}$  – observation,  $\mu$  – overall mean,  $d_i$  – fixed effect of genotype group,  $b_j$  – fixed effect of the breed,  $(d_i \cdot b_j)$  – the interaction between  $d_i$  genotype group

---

and breed,  $\alpha(x_{ijk})$  – covariate for weight of the right side of the carcass,  $e_{ijkl}$  – random error. GLM model for analysis within breeds omitted  $b_j$  – fixed effect of breed and  $(d_i \cdot b_j)$  – the interaction between  $d_i$  genotype group and breed.

---
